# Supplementary material for: Attitudes towards people with mental disorders: Results of a psychometric evaluation and confirmatory factor analysis of the Stigma Towards People with Mental Disorders (SToP- MD) Scale
Source: Research Square preprint supplement (doi:10.21203/rs.3.rs-6890888/v1), 2025-08-19
Supplement: Supplementary file [file 6829e53e5f413db8f45a914a.pdf]

**Below you will now find several statements about people with mental disorders. Please indicate how strongly you agree with each statement. Use the scale from 1 = “completely disagree” to 6 = “completely agree”.**

[illegible]
